# Supplementary material for: Assessment of the Mechanical and Thermal Properties of Injection-Molded Poly(3-hydroxybutyrate-co-3-hydroxyhexanoate)/Hydroxyapatite Nanoparticles Parts for Use in Bone Tissue Engineering
Source: PubMed Central journal article supplement (PMC7362193; doi:10.3390/polym12061389), 2020-06-21
Supplement: polymers-12-01389-s001.pdf [file polymers-12-01389-s001.pdf]

**Level of significance (*p*) values for Table 1.** Mechanical properties of the injection-molded parts of poly(3-hydroxybutyrate-*co*-3-hydroxyhexanoate) [P(3HB-*co*-3HHx)]/hydroxyapatite nanoparticles (nHA) in terms of maximum tensile stress ( $\sigma_{\max}$ ), tensile modulus ( $E_t$ ), elongation at break ( $\epsilon_b$ ), maximum flexural stress ( $\sigma_f$ ), flexural modulus ( $E_f$ ), Shore D hardness, and impact strength.

| Part                              | $\sigma_{\max}$ (MPa) | $E_t$ (MPa) | $\epsilon_b$ (%) | $\sigma_f$ (MPa) | $E_f$ (MPa) | Shore D hardness | Impact Strength (kJ/m <sup>2</sup> ) |
|-----------------------------------|-----------------------|-------------|------------------|------------------|-------------|------------------|--------------------------------------|
| P(3HB- <i>co</i> -3HHx)           | -                     | -           | -                | -                | -           | -                | -                                    |
| P(3HB- <i>co</i> -3HHx) + 2.5 nHA | 0.056                 | 0.080       | 0.309            | 0.052            | 0.032       | 0.027            | 0.285                                |
| P(3HB- <i>co</i> -3HHx) + 5 nHA   | 0.012                 | 0.032       | 0.031            | 0.039            | 0.090       | 0.043            | 0.218                                |
| P(3HB- <i>co</i> -3HHx) + 10 nHA  | 0.016                 | 0.158       | 0.163            | 0.014            | 0.122       | 0.037            | 0.115                                |
| P(3HB- <i>co</i> -3HHx) + 20 nHA  | 0.066                 | 0.204       | 0.319            | 0.011            | 0.284       | 0.067            | 0.248                                |

**Level of significance (*p*) values for Table 2.** Thermal properties of the injection-molded poly(3-hydroxybutyrate-*co*-3-hydroxyhexanoate) [P(3HB-*co*-3HHx)]/hydroxyapatite nanoparticles (nHA) parts in terms of glass transition temperature ( $T_g$ ), cold crystallization temperature ( $T_{cc}$ ), melting temperatures ( $T_{m1}$  and  $T_{m2}$ ), cold crystallization enthalpy ( $\Delta H_{cc}$ ), melting enthalpy ( $\Delta H_m$ ), and maximum degree of crystallinity ( $\chi_{c\max}$ ).

| Part                              | $T_g$ (°C) | $T_{cc}$ (°C) | $T_{m1}$ (°C) | $T_{m2}$ (°C) | $\Delta H_{cc}$ (J/g) | $\Delta H_m$ (J/g) | $\chi_{c\max}$ (%) |
|-----------------------------------|------------|---------------|---------------|---------------|-----------------------|--------------------|--------------------|
| P(3HB- <i>co</i> -3HHx)           | -          | -             | -             | -             | -                     | -                  | -                  |
| P(3HB- <i>co</i> -3HHx) + 2.5 nHA | 0.002      | 0.041         | 0.009         | 0.011         | 0.443                 | 0.095              | 0.090              |
| P(3HB- <i>co</i> -3HHx) + 5 nHA   | 0.003      | 0.030         | 0.004         | 0.013         | 0.051                 | 0.128              | 0.186              |
| P(3HB- <i>co</i> -3HHx) + 10 nHA  | 0.001      | 0.059         | 0.006         | 0.005         | 0.052                 | 0.142              | 0.132              |
| P(3HB- <i>co</i> -3HHx) + 20 nHA  | 0.002      | 0.051         | 0.010         | 0.003         | 0.082                 | 0.099              | 0.010              |

**Level of significance (*p*) values for Table 3.** Main thermal degradation parameters of the injection-molded poly(3-hydroxybutyrate-*co*-3-hydroxyhexanoate) [P(3HB-*co*-3HHx)]/hydroxyapatite nanoparticles (nHA) parts in terms of onset temperature of degradation ( $T_{5\%}$ ), degradation temperature ( $T_{deg}$ ), and residual mass at 700 °C.

| Part                              | $T_{5\%}$ (°C) | $T_{deg}$ (°C) | Residual mass (%) |
|-----------------------------------|----------------|----------------|-------------------|
| P(3HB- <i>co</i> -3HHx)           | -              | -              | -                 |
| P(3HB- <i>co</i> -3HHx) + 2.5 nHA | 0.021          | 0.041          | 0.867             |
| P(3HB- <i>co</i> -3HHx) + 5 nHA   | 0.025          | 0.028          | 0.404             |
| P(3HB- <i>co</i> -3HHx) + 10 nHA  | 0.058          | 0.025          | 0.555             |
| P(3HB- <i>co</i> -3HHx) + 20 nHA  | 0.051          | 0.059          | 0.793             |

**Level of significance (*p*) values for Table 4.** Thermomechanical properties of the injection-molded poly(3-hydroxybutyrate-*co*-3-hydroxyhexanoate) [P(3HB-*co*-3HHx)]/hydroxyapatite nanoparticles (nHA) parts in terms of dynamic damping factor (*tan δ*) peak, glass transition temperature ( $T_g$ ), storage modulus ( $E'$ ) measured at -40 °C, 37 °C, and 70 °C, and coefficient of linear thermal expansion (CLTE) below and above  $T_g$ .

| Part                              | DMTA                   |                      |                     |                     | TMA        |                               |             |
|-----------------------------------|------------------------|----------------------|---------------------|---------------------|------------|-------------------------------|-------------|
|                                   | <i>tan δ</i> peak (°C) | $E'$ at -40 °C (MPa) | $E'$ at 37 °C (MPa) | $E'$ at 70 °C (MPa) | $T_g$ (°C) | CLTE ( $\mu/m\cdot^\circ C$ ) |             |
|                                   |                        |                      |                     |                     |            | Below $T_g$                   | Above $T_g$ |
| P(3HB- <i>co</i> -3HHx)           | -                      | -                    | -                   | -                   | -          | -                             | -           |
| P(3HB- <i>co</i> -3HHx) + 2.5 nHA | 0.021                  | 0.280                | 0.153               | 0.027               | 0.002      | 0.051                         | 0.078       |
| P(3HB- <i>co</i> -3HHx) + 5 nHA   | 0.031                  | 0.397                | 0.130               | 0.068               | 0.001      | 0.038                         | 0.014       |
| P(3HB- <i>co</i> -3HHx) + 10 nHA  | 0.023                  | 0.581                | 0.243               | 0.141               | 0.002      | 0.023                         | 0.065       |
| P(3HB- <i>co</i> -3HHx) + 20 nHA  | 0.226                  | 0.400                | 0.260               | 0.295               | 0.001      | 0.033                         | 0.122       |
